# Supplementary material
Source: Springer Nature journal article supplement (https://www.springermedizin.de/resource/supplementary/12958_2005_294_MOESM2_ESM.pdf/9567560)

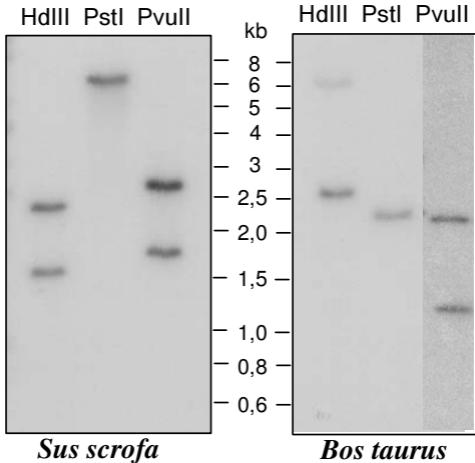

Supplement: MOESM2 [file 9567560]
